# Supplementary material for: An electrochemiluminescence aptasensor for diethylstilbestrol assay based on resonance energy transfer between Ag3PO4-Cu-MOF(ii) and silver nanoparticles
Source: Royal Society of Chemistry journal article supplement (doi:10.1039/d1an00599e), 2021-01-01
Supplement: d1an00599e1.pdf [file d1an00599e1.pdf]

## Supporting Information

### **Electrochemiluminescence aptasensor for diethylstilbestrol detection based on resonance energy transfer between Ag<sub>3</sub>PO<sub>4</sub>-Cu-MOF( II ) and silver nanoparticles and its application**

Chang Su,<sup>a</sup> Qingyuan Song,<sup>a</sup> Ding Jiang,<sup>a,b</sup> Chunping Dong,<sup>c</sup> Xueling Shan,<sup>\*a,b</sup> and  
Zhidong Chen<sup>\*a,b</sup>

<sup>a</sup>Jiangsu Key Laboratory of Advanced Catalytic Materials and Technology, School of  
Petrochemical Engineering, Changzhou University, Changzhou 213164, China.

<sup>b</sup>Advanced Catalysis and Green Manufacturing Collaborative Innovation Center,  
Changzhou University, Changzhou 213164, China.

<sup>c</sup>School of Pharmacy, Changzhou University, Changzhou 213164, China

Corresponding author E-mail : \*Z. Chen: [zdchen@cczu.edu.cn](mailto:zdchen@cczu.edu.cn), X. Shan:

[shan0523@cczu.edu.cn](mailto:shan0523@cczu.edu.cn)

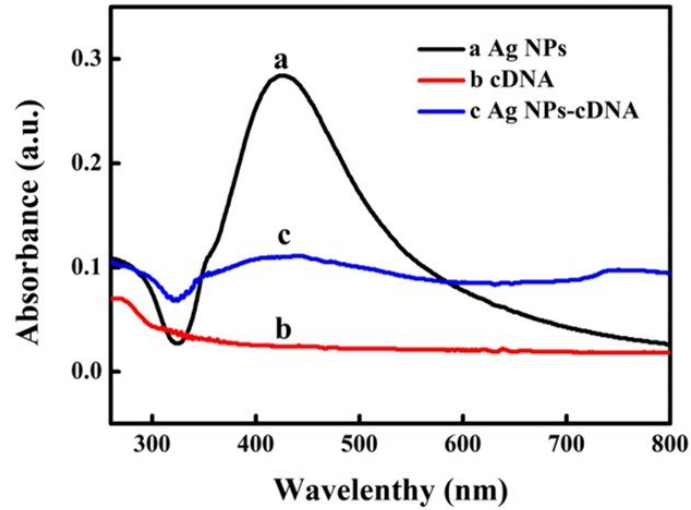

**Figure S1.** UV-Vis absorption spectra of Ag NPs (a), cDNA (b) and Ag NPs-cDNA (c)

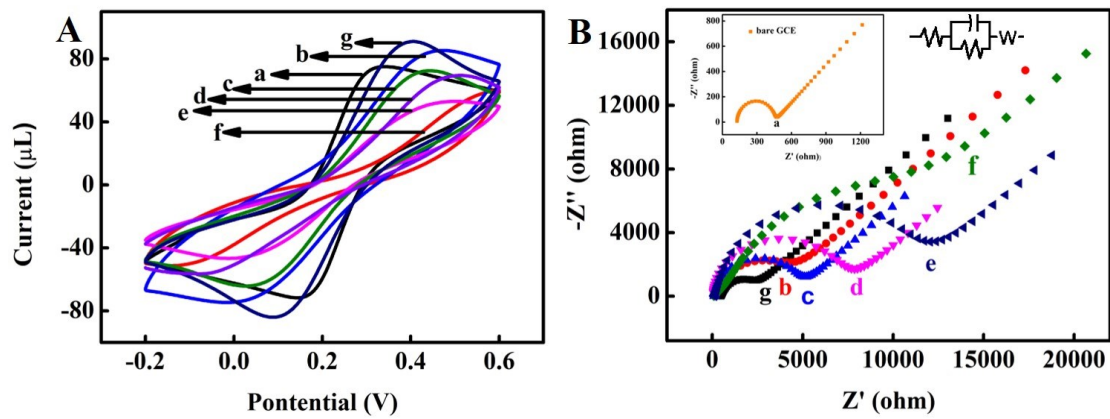

**Figure S2.** (A) CV curves and (B) EIS of different modified electrodes: (a) bare GCE; (b) Cu-MOF/GCE; (c)  $\text{Ag}_3\text{PO}_4$ /GCE; (d)  $\text{Ag}_3\text{PO}_4$ -Cu-MOF/GCE; (e) apt/ $\text{Ag}_3\text{PO}_4$ -Cu-MOF/GCE; (f) Ag NPs-cDNA/apt/ $\text{Ag}_3\text{PO}_4$ -Cu-MOF/GCE; (g) DES-Ag NPs-cDNA/apt/ $\text{Ag}_3\text{PO}_4$ -Cu-MOF/GCE

As can be seen in Figure S3, after modifying  $\text{Ag}_3\text{PO}_4$ (Figure S3(c)), the impedance of  $\text{Ag}_3\text{PO}_4\text{-Cu-MOF}$  did not change much compared with the single  $\text{Ag}_3\text{PO}_4$ , so the Cu-MOF did not affect the experiment.

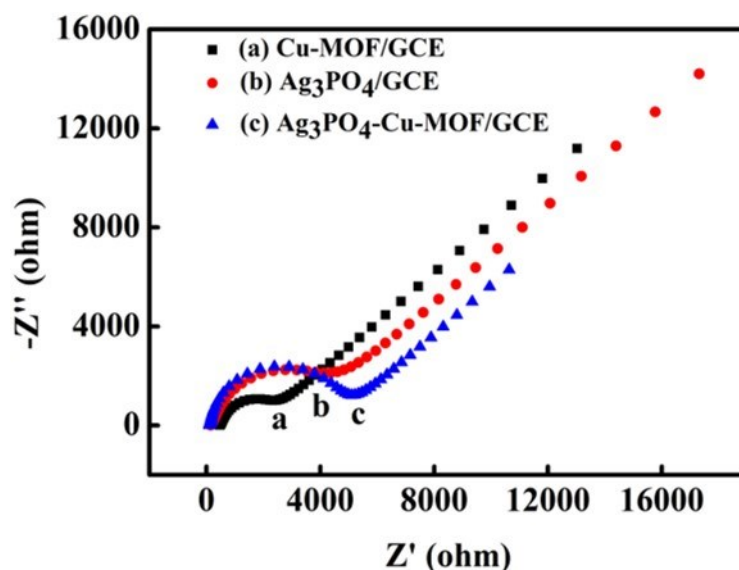

**Figure S3.** EIS of different modified electrodes: (a) Cu-MOF/GCE; (b)  $\text{Ag}_3\text{PO}_4$ /GCE; (d)  $\text{Ag}_3\text{PO}_4\text{-Cu-MOF}$ /GCE

**Table S1.** Comparison of this developed aptasensor with those in the literature for  
DES detection.

| Method                       | Linear range                                    | LOD                      | Reference |
|------------------------------|-------------------------------------------------|--------------------------|-----------|
| ECL                          | $1 \times 10^{-8} \sim 1.2 \times 10^{-6}$ M    | $4.6 \times 10^{-9}$ M   | 1         |
| DPV                          | $2.0 \times 10^{-9} \sim 2 \times 10^{-7}$ M    | $9 \times 10^{-11}$ M    | 2         |
| CV                           | $2.0 \times 10^{-5} \sim 1.0 \times 10^{-7}$ M  | $1.5 \times 10^{-8}$ M   | 3         |
| Electrochemical immunosensor | $1.9 \times 10^{-11} \sim 1.9 \times 10^{-9}$ M | $6.98 \times 10^{-12}$ M | 4         |
| ECL(MMIPs-QDs-Aptamer)       | $0.3 \sim 1.0 \times 10^5$ pg/mL                | 0.1 pg/mL                | 5         |
| ECL(CdTe@ZnS/r-GO)           | $1.8 \times 10^3 \sim 25.0$ nM                  | 0.25 pM                  | 6         |
| ECL                          | $1.0 \times 10^{-12} \sim 1.0 \times 10^{-4}$   | $7.2 \times 10^{-13}$    | This work |

**Table S2** DES determination result table in fish pond water

| Sample         | Added value/fM | Measured value/fM | Recovery rate/% | RSD/% |
|----------------|----------------|-------------------|-----------------|-------|
| Fishpond water |                | 50.00             | 100.00          |       |
|                | 50.00          | 52.00             | 102.00          | 4.16  |
|                |                | 48.00             | 98.00           |       |

## References

1. X. Chen, Z. Shi, Y. Hu, X. Xiao and G. Li, *Talanta*, 2018, **188**, 81-90.
2. D. Lu, S. Lin, L. Wang, X. Shi, C. Wang and Y. Zhang, *Electrochim. Acta*, 2012, **85**, 131-138.
3. J. Fei, X. Wen, L. Yi, F. Ge, Y. Zhang, M. Huang and X. Chen, *J. Appl. Electrochem.*, 2008, **38**, 1527-1533.
4. P. Xiong, N. Gan, H. Cui, J. Zhou, Y. Cao, F. Hu and T. Li, *Electrochim. Acta*, 2014, **181**, 453-462.
5. Q. Jiang, D. Zhang, Y. Cao and N. Gan, *J. Electroanal. Chem.*, 2017, **789**, 1-8.
6. W. R. Zhao, T. F. Kang, Y. H. Xu, X. Zhang, H. Liu, A. J. Ming, L. P. Lu, S. Y. Cheng and F. Wei, *Sens. Actuators, B.*, 2020, **306**, 127563.
